# Supplementary material
Source: publisher site journal article supplement (doi:10.18632/aging.206386)
Supplement: Supplementary file 3 [file aging-v18i1-206386-supplementary-material-SD2.pdf]

## SUPPLEMENTARY TABLES

**Supplementary Table 1. Effect of the multimodal lifestyle intervention on DNA methylation-based aging markers.**

| Aging clock      | INT                     |                        |                        | CON                     |                        |                        | p-value | q-value |
|------------------|-------------------------|------------------------|------------------------|-------------------------|------------------------|------------------------|---------|---------|
|                  | Estimated marginal mean | Lower confidence limit | Upper confidence limit | Estimated marginal mean | Lower confidence limit | Upper confidence limit |         |         |
| GrimAge          | -0.020                  | -0.618                 | 0.578                  | 0.750                   | 0.214                  | 1.286                  | 0.049   | 0.245   |
| GrimAge v2       | 0.173                   | -0.594                 | 0.940                  | 0.680                   | -0.006                 | 1.367                  | 0.304   | 0.590   |
| PC-PhenoAge      | -0.432                  | -1.549                 | 0.685                  | -0.352                  | -1.318                 | 0.614                  | 0.910   | 0.910   |
| PC-Horvath clock | 0.214                   | -0.144                 | 0.572                  | 0.347                   | 0.049                  | 0.645                  | 0.556   | 0.695   |
| PC-Hannam clock  | 0.041                   | -0.512                 | 0.593                  | 0.365                   | -0.108                 | 0.838                  | 0.354   | 0.590   |

**Supplementary Table 2. Effect of the multimodal lifestyle intervention on surrogate markers of GrimAge.**

| Surrogate marker | INT                     |                        |                        | CON                     |                        |                        | p-value | q-value |
|------------------|-------------------------|------------------------|------------------------|-------------------------|------------------------|------------------------|---------|---------|
|                  | Estimated marginal mean | Lower confidence limit | Upper confidence limit | Estimated marginal mean | Lower confidence limit | Upper confidence limit |         |         |
| rawADM           | 0.984                   | -3.799                 | 5.768                  | 1.315                   | -2.804                 | 5.434                  | 0.911   | 0.911   |
| rawB2M           | -12414.536              | -25329.874             | 500.803                | 3418.510                | -7498.419              | 14335.440              | 0.052   | 0.182   |
| rawCystatinC     | -2683.015               | -7329.264              | 1963.233               | 7316.781                | 3403.346               | 11230.216              | 0.001   | 0.007   |
| rawGDF15         | 8.900                   | -16.951                | 34.751                 | 34.670                  | 12.985                 | 56.355                 | 0.121   | 0.282   |
| rawLeptin        | -740.730                | -1290.489              | -190.971               | -364.892                | -823.197               | 93.412                 | 0.268   | 0.469   |
| rawPAI1          | -933.099                | -1760.019              | -106.179               | -559.878                | -1273.115              | 153.359                | 0.466   | 0.652   |
| rawTIMP1         | -25.200                 | -140.853               | 90.452                 | -17.065                 | -116.247               | 82.117                 | 0.909   | 0.911   |

**Supplementary Table 3. Changes of DNA methylation-based aging markers and surrogate markers of GrimAge during intervention (mean  $\pm$  SD).**

|                 |         | <b>INT</b>               | <b>CON</b>             |
|-----------------|---------|--------------------------|------------------------|
| PC-PhenoAge     | Week 0  | -1.13 $\pm$ 2.87         | 0.92 $\pm$ 3.66        |
|                 | Week 12 | -1.28 $\pm$ 3.54         | 0.63 $\pm$ 4.10        |
| PC-HorvathClock | Week 0  | -0.62 $\pm$ 2.60         | 1.07 $\pm$ 2.22        |
|                 | Week 12 | -0.30 $\pm$ 2.53         | 1.43 $\pm$ 2.36        |
| PC-HannumClock  | Week 0  | -0.70 $\pm$ 2.32         | 0.59 $\pm$ 2.09        |
|                 | Week 12 | -0.51 $\pm$ 2.65         | 0.98 $\pm$ 2.21        |
| GrimAge         | Week 0  | 0.90 $\pm$ 3.36          | 2.95 $\pm$ 3.47        |
|                 | Week 12 | 0.70 $\pm$ 3.19          | 3.41 $\pm$ 3.65        |
| GrimAgev2       | Week 0  | 0.43 $\pm$ 3.89          | 2.81 $\pm$ 3.54        |
|                 | Week 12 | 0.47 $\pm$ 3.77          | 3.18 $\pm$ 3.70        |
| DunedinPACE     | Week 0  | 1.05 $\pm$ 0.08          | 1.10 $\pm$ 0.07        |
|                 | Week 12 | 1.03 $\pm$ 0.09          | 1.10 $\pm$ 0.07        |
| DNAmADM         | Week 0  | 1.45 $\pm$ 21.58         | -2.38 $\pm$ 16.76      |
|                 | Week 12 | 1.33 $\pm$ 19.34         | -1.22 $\pm$ 18.72      |
| DNAmB2M         | Week 0  | -12803.01 $\pm$ 43146.48 | 1415.11 $\pm$ 50947.56 |
|                 | Week 12 | -16580.52 $\pm$ 29680.02 | 6862.68 $\pm$ 39378.58 |
| DNAmCystatinC   | Week 0  | -403.69 $\pm$ 15965.27   | 3462.10 $\pm$ 16561.07 |
|                 | Week 12 | -3922.31 $\pm$ 11831.65  | 8084.86 $\pm$ 12774.48 |
| DNAmGDF15       | Week 0  | -3.04 $\pm$ 64.60        | 37.17 $\pm$ 46.00      |
|                 | Week 12 | -5.50 $\pm$ 53.38        | 37.38 $\pm$ 52.06      |
| DNAmLeptin      | Week 0  | -219.47 $\pm$ 1417.09    | 326.89 $\pm$ 1611.20   |
|                 | Week 12 | -583.42 $\pm$ 1068.03    | -281.05 $\pm$ 1181.55  |
| DNAmPAI1        | Week 0  | -468.07 $\pm$ 2117.31    | -496.06 $\pm$ 2263.30  |
|                 | Week 12 | -690.36 $\pm$ 2072.97    | -467.18 $\pm$ 2216.02  |
| DNAmTIMP1       | Week 0  | -71.97 $\pm$ 448.88      | 4.77 $\pm$ 388.15      |
|                 | Week 12 | -71.55 $\pm$ 455.30      | 3.58 $\pm$ 352.49      |
