# Supplementary material
Source: publisher site journal article supplement (doi:10.18632/aging.206386)
Supplement: Supplementary file 5 [file aging-v18i1-206386-supplementary-material-SD4.pdf]

**Supplementary Table 5. Frequency of exercise sessions per week during the intervention.**

| <b>Donor of INT group</b> | <b>Mean <math>\pm</math> SD (sessions/week)</b> |
|---------------------------|-------------------------------------------------|
| ID01                      | 5.3 $\pm$ 1.3                                   |
| ID02                      | 6.9 $\pm$ 0.3                                   |
| ID03                      | 6.2 $\pm$ 1.0                                   |
| ID04                      | 5.8 $\pm$ 1.4                                   |
| ID05                      | 4.3 $\pm$ 1.8                                   |
| ID06                      | 6.8 $\pm$ 0.5                                   |
| ID07                      | 3.1 $\pm$ 0.3                                   |
| ID08                      | 5.1 $\pm$ 1.1                                   |
| ID09                      | 3.8 $\pm$ 2.0                                   |
| ID10                      | 7.0 $\pm$ 0.0                                   |
| ID11                      | 5.7 $\pm$ 1.1                                   |
| ID12                      | 4.8 $\pm$ 1.3                                   |
| ID13                      | 6.8 $\pm$ 0.5                                   |
| ID14                      | 3.0 $\pm$ 0.9                                   |
| ID15                      | 4.8 $\pm$ 1.0                                   |
| ID16                      | 5.3 $\pm$ 1.5                                   |
| ID17                      | 3.5 $\pm$ 0.7                                   |
| ID18                      | 4.8 $\pm$ 1.2                                   |
| ID19                      | 3.9 $\pm$ 1.1                                   |
| ID20                      | 6.8 $\pm$ 0.5                                   |
| ID21                      | 5.6 $\pm$ 1.1                                   |
| Average                   | 5.2 $\pm$ 1.3                                   |
